# Supplementary material
Source: Springer Nature journal article supplement (https://www.springermedizin.de/resource/supplementary/12874_2007_280_MOESM2_ESM.pdf/9434144)
Supplement: MOESM2 [file 9434144]

| Code System                          | 1M-XS-Y | 2F-JLP-Y | 3F-JLP-Y | 4F-RC-M | 5F-RC-O | 6F-RC-O | 7F-RC-O | 8F-WZ- | 9F-WZ-Y | 10F-WZ- | 11F-XS- | 12F-XS- | 13F-XS- | 14F-XS- | 15M-JLP | 16M-JLP |
|--------------------------------------|---------|----------|----------|---------|---------|---------|---------|--------|---------|---------|---------|---------|---------|---------|---------|---------|
| [-] Attitude to family DOT           |         |          |          |         |         |         |         |        |         |         |         |         |         |         |         |         |
| [-] Positive                         |         |          |          |         |         |         |         |        |         |         |         |         |         |         |         |         |
| [-] Negative                         |         |          |          |         |         |         |         |        |         |         |         |         |         |         |         |         |
| [-] Attitude to DOT by priv...       |         |          |          |         |         |         |         |        |         |         |         |         |         |         |         |         |
| [-] DOT implementation               |         | ■        |          |         |         |         |         |        |         |         |         |         |         |         |         |         |
| [-] Patient own                      |         |          |          | ■       |         |         |         | ■      | ■       | ■       |         |         |         | ■       | ■       |         |
| [-] By family members                |         | ■        |          |         |         |         |         |        |         |         |         |         |         |         | ■       |         |
| [-] By doctors                       |         |          |          |         |         |         |         |        |         |         |         |         |         |         |         |         |
| [-] Home visit                       |         |          | ■        |         | ■       | ■       |         |        |         |         |         |         |         |         |         |         |
| [-] By telephone                     |         |          |          |         |         |         |         |        |         |         |         |         |         |         |         |         |
| [-] At clinic                        |         |          |          |         |         |         |         |        |         |         |         |         |         |         |         |         |
| [-] Home visit details               |         |          |          |         |         |         |         |        |         |         |         |         |         |         |         |         |
| [-] Frequency and duration           |         | ■        |          |         | ■       |         |         |        |         |         |         |         |         |         |         |         |
| [-] Content                          |         |          |          |         | ■       |         |         |        |         |         |         |         |         |         |         |         |
| [-] Supervision by higher level ...  |         | ■        |          |         |         |         |         |        | ■       |         |         |         |         |         | ■       |         |
| [-] Difficulties with patient man... |         |          |          |         |         |         |         |        |         |         |         |         |         |         |         |         |
| [-] Patients' adherence              |         |          |          |         |         |         |         |        |         |         |         |         |         |         |         |         |
| [-] Adherence with treatment         | ■       | ■        | ■        |         | ■       | ■       | ■       |        |         | ■       |         | ■       | ■       | ■       | ■       |         |
| [-] Motivation to adherence          |         |          |          |         |         |         |         |        |         |         |         |         |         |         |         |         |
| [-] Causes to poor adherence         |         |          |          |         |         |         |         |        |         |         |         |         |         |         |         |         |
| [-] Prolonged treatment              |         |          |          |         |         |         |         |        |         |         |         |         |         |         |         |         |
| [-] Cost of TB health service        |         | ■        | ■        |         | ■       | ■       |         | ■      |         |         |         |         |         |         |         | ■       |
| [-] Transportation cost              |         | ■        | ■        |         | ■       | ■       |         | ■      | ■       |         |         |         |         |         |         | ■       |
| [-] Drugs cost                       |         | ■        | ■        |         | ■       | ■       |         | ■      |         | ■       |         |         | ■       | ■       | ■       | ■       |
| [-] Examinations cost                |         | ■        | ■        |         | ■       | ■       |         | ■      |         | ■       |         |         | ■       | ■       | ■       | ■       |
| [-] Patients' complaint              |         | ■        | ■        |         | ■       | ■       |         | ■      |         | ■       |         |         | ■       | ■       | ■       | ■       |
| [-] Patients' economic burden        |         | ■        | ■        |         | ■       | ■       |         | ■      |         | ■       |         |         | ■       | ■       | ■       | ■       |
| [-] Incentives                       |         |          |          |         |         |         |         |        |         |         |         |         |         |         |         |         |
| [-] Dealing with TB suspects         |         |          |          |         |         |         |         |        |         |         |         |         |         |         |         |         |
| [-] Professional training            |         |          |          |         |         |         |         |        |         |         |         |         |         |         |         |         |
| [-] Health education                 |         | ■        | ■        |         |         | ■       |         |        |         | ■       |         |         |         |         |         |         |
| [-] Influences caused by TB          |         |          |          |         |         |         |         |        |         |         |         |         |         |         |         |         |
| [-] Social stigma                    |         |          |          |         |         |         |         |        | ■       |         |         |         |         |         |         | ■       |
| [-] No stigma                        |         |          |          |         |         |         |         |        |         |         |         |         |         |         |         |         |
| [-] Stigma from family ...           |         |          |          |         |         |         |         |        |         |         |         |         |         |         |         |         |
| [-] stigma from neighbo...           |         |          | ■        |         | ■       |         |         |        |         |         |         |         |         |         |         |         |
| [-] impact on marriage               |         |          |          |         |         | ■       |         |        |         |         |         |         |         |         |         | ■       |
| [-] Other influences                 |         | ■        |          |         |         |         |         |        |         |         |         |         |         |         |         | ■       |
| [-] Government commitment            |         |          |          |         |         |         |         |        |         |         |         |         |         |         |         |         |

Text: 6F-RC-O-I????-???(?)  
Code: Influences caused by TB|Social stigma|impact on marriage  
Coded Segments: 3
